# The Relationship Between Knowledge of Recent HbA<sub>1c</sub> Values and Diabetes Care Understanding and Self-Management

MICHELE HEISLER, MD<sup>1,2,3</sup>  
JOHN D. PIETTE, PHD<sup>1,2,3</sup>  
MICHAEL SPENCER, PHD<sup>4</sup>

EDIE KIEFFER, PHD<sup>3,4</sup>  
SANDEEP VIJAN, MD<sup>1,2,3</sup>

**OBJECTIVE** — Knowledge of one's actual and target health outcomes (such as HbA<sub>1c</sub> values) is hypothesized to be a prerequisite for effective patient involvement in managing chronic diseases such as diabetes. We examined 1) the frequency and correlates of knowing one's most recent HbA<sub>1c</sub> test result and 2) whether knowing one's HbA<sub>1c</sub> value is associated with a more accurate assessment of diabetes control and better diabetes self-care understanding, self-efficacy, and behaviors related to glycemic control.

**RESEARCH DESIGN AND METHODS** — We conducted a cross-sectional survey of a sample of 686 U.S. adults with type 2 diabetes in five health systems who had HbA<sub>1c</sub> checked in the previous 6 months. Independent variables included patient characteristics, health care provider communication, and health system type. We examined bivariate and multivariate associations between each variable and the respondents' knowledge of their last HbA<sub>1c</sub> values and assessed whether knowledge of HbA<sub>1c</sub> was associated with key diabetes care attitudes and behaviors.

**RESULTS** — Of the respondents, 66% reported that they did not know their last HbA<sub>1c</sub> value and only 25% accurately reported that value. In multivariate analyses, more years of formal education and high evaluations of provider thoroughness of communication were independently associated with HbA<sub>1c</sub> knowledge. Respondents who knew their last HbA<sub>1c</sub> value had higher odds of accurately assessing their diabetes control (adjusted odds ratio 1.59, 95% CI 1.05–2.42) and better reported understanding of their diabetes care ( $P < 0.001$ ). HbA<sub>1c</sub> knowledge was not associated with respondents' diabetes care self-efficacy or reported self-management behaviors.

**CONCLUSIONS** — Respondents who knew their HbA<sub>1c</sub> values reported better diabetes care understanding and assessment of their glycemic control than those who did not. Knowledge of one's HbA<sub>1c</sub> level alone, however, was not sufficient to translate increased understanding of diabetes care into the increased confidence and motivation necessary to improve patients' diabetes self-management. Strategies to provide information to patients must be combined with other behavioral strategies to motivate and help patients effectively manage their diabetes.

*Diabetes Care* 28:816–822, 2005

From the <sup>1</sup>Veterans Affairs Center for Practice Management and Outcomes Research, Veterans Affairs Ann Arbor Healthcare System, Ann Arbor, Michigan; the <sup>2</sup>Department of Internal Medicine, University of Michigan, Ann Arbor, Michigan; the <sup>3</sup>Michigan Diabetes Research and Training Center, University of Michigan School of Medicine, Ann Arbor, Michigan; and the <sup>4</sup>University of Michigan School of Social Work, Ann Arbor, Michigan.

Address correspondence and reprint requests to Michele Heisler, HSR&D Field Program, P.O. Box 130170, 11H, Ann Arbor, MI 48113. E-mail: mheisler@umich.edu.

Received for publication 27 October 2004 and accepted in revised form 16 December 2004.

**Abbreviations:** AMC, academic medical center; PCP, primary care provider; VA, Veterans Affairs.

A table elsewhere in this issue shows conventional and Système International (SI) units and conversion factors for many substances.

© 2005 by the American Diabetes Association.

The costs of publication of this article were defrayed in part by the payment of page charges. This article must therefore be hereby marked "advertisement" in accordance with 18 U.S.C. Section 1734 solely to indicate this fact.

A growing body of evidence suggests that patients with chronic diseases who are engaged and active participants in their health care have better health outcomes (1–4). For example, patients who have completed chronic disease self-management training programs have improved self-efficacy and physical functioning and less acute care use than nonparticipants (2,5–8). Chronic illness care self-efficacy is positively associated with health outcomes (9–15). Similarly, collaborating with health care providers and engaging in shared clinical decision making are associated with better self-care behaviors and disease outcomes (1,6,14,16–20).

Less is known, however, about the specific skills, knowledge, beliefs, and motivations that patients need to most effectively participate in their chronic disease management. Patient knowledge of actual and target disease management outcomes (e.g., HbA<sub>1c</sub> test results) is hypothesized to be an important prerequisite for effective patient "activation." Providing immediate feedback of HbA<sub>1c</sub> values to insulin-taking diabetic adults and their providers (21) and graphical information to patients on their HbA<sub>1c</sub> and other laboratory values has been found to improve glycemic control and other diabetes outcomes (22). Organizations such as the American Diabetes Association have launched campaigns urging diabetic patients to be aware of their target and actual HbA<sub>1c</sub> values, blood pressure, and cholesterol levels (their "ABCs") and to be proactive in discussing these with their doctors (23).

Prior studies have documented that many diabetic patients do not know whether they had a recent HbA<sub>1c</sub> test or its value (24–26). There is little empirical information, however, on factors that influence whether patients know their last HbA<sub>1c</sub> values and have an accurate assessment of what that value means. It also is unclear whether knowing one's level is indeed associated with better patient self-management, self-efficacy, or other

positive health outcomes. Moreover, although differences in patient activation may contribute to racial/ethnic disparities in diabetes processes and outcomes of care (27), few studies have explicitly tested this hypothesis. Therefore, we examined 1) the prevalence and correlates of knowing one's most recent HbA<sub>1c</sub> value; 2) whether knowing one's HbA<sub>1c</sub> is associated with a more accurate assessment of one's level of diabetes control, better understanding of diabetes care, diabetes care self-efficacy (i.e., the confidence that one can carry out a behavior necessary to reach a desired goal) and self-management behaviors; and 3) racial/ethnic differences in accurately knowing one's HbA<sub>1c</sub> level and in other measures of diabetes self-care and outcomes.

## RESEARCH DESIGN AND METHODS

The study sample was drawn from 843 adults with type 2 diabetes receiving care in southeast Michigan health care facilities who had been surveyed about their diabetes-related knowledge, attitudes, and service use. Participants were surveyed between May 2001 and October 2002 in a Veterans Affairs (VA) medical center, an academic medical center (AMC), and three inner-city health systems (a total of five sites). The survey protocols received institutional review board approval at all sites, and written informed consent was obtained from all participants. Eligible patients in the VA and AMC samples, identified through electronic medical records, were  $\geq 30$  years old, had a prescription for a glucose control medication or supplies or one hospitalization or two outpatient visits with a diabetes-related ICD-9 code, had seen their primary care provider (PCP) in the prior 6 months, and were scheduled to see the same PCP again in the next 6 months.

In all, 562 eligible VA patients and 720 eligible AMC patients were identified and sent surveys by mail. Excluded were 74 patients who reported not having type 2 diabetes, had severe dementia, or were deceased. Of the remaining patients, 663 completed the survey (56% response rate). Participants identified at inner-city health systems from electronic medical records were recruited as part of the "Racial and Ethnic Approaches to Community Health 2010" Detroit Partnership, supported by the Centers for Disease Control and Prevention and described

elsewhere (28). Participants had type 2 diabetes and were  $\geq 18$  years old, lived in selected zip codes, and received diabetes care for at least 1 year from their PCPs. Patients were excluded if they had a terminal illness that would preclude participation in a self-management intervention. In all, 346 eligible inner-city patients were identified, of which 180 agreed to enroll and completed the baseline survey upon which this study's analyses are based (52% response rate). In total, 1,554 eligible patients were identified and 843 completed baseline surveys (55% response rate). Respondents at the VA and AMC were more likely to be older, married, nonwhite, and male than nonrespondents. Respondents in the inner-city health systems were more likely to be older and female than nonrespondents.

For the current study, we identified respondents who had recorded HbA<sub>1c</sub> values within the 6-month period before taking the survey (81% of all survey respondents). Patients who were nonwhite, using no medications, and receiving care at the inner-city health systems were less likely to have recorded HbA<sub>1c</sub> values.

All participants completed surveys that included core questions about their characteristics, diabetes self-management, and quality of diabetes care. The AMC/VA patient survey was a self-administered written English survey and the inner-city survey was conducted in-person in either Spanish or English.

In the survey, respondents were asked, "What has your HbA<sub>1c</sub> (lab value for overall sugar control) been in the past 6 months?" Respondents could choose one of six response categories:  $<7$ ; between 7 and 8; between 8 and 9; between 9 and 10;  $>10$ ; and don't know. We classified respondents as knowing their HbA<sub>1c</sub> value if their actual test result was within 0.5 percentage points of the lower or upper boundary of the chosen response category. For example, if respondents reported that their HbA<sub>1c</sub> was  $<7$ , they were grouped as knowing their HbA<sub>1c</sub> if their recorded HbA<sub>1c</sub> was  $<7.5$ . Respondents were coded as not knowing their value if their estimate differed by  $>0.5\%$  or if they responded, "I don't know."

To assess whether respondents had a biomedically accurate assessment of their HbA<sub>1c</sub> value, we created a variable comparing the self-evaluation of the level of diabetes control in the past 6 months with

the actual HbA<sub>1c</sub> test value. On the survey, respondents were asked whether, based on their HbA<sub>1c</sub> value in the past 6 months, their diabetes was in "excellent," "good," "fair," or "poor" control. We classified respondents as having an accurate assessment of their HbA<sub>1c</sub> value if they evaluated their diabetes control as poor and had HbA<sub>1c</sub> values  $>8.5$ ; reported "fair" and had HbA<sub>1c</sub> between 7.5 and 8.5; or reported "good" or "excellent" and had HbA<sub>1c</sub>  $\leq 7.5$ .

To evaluate self-rated understanding of diabetes care, we used the following question from the Diabetes Care Profile: "How well do you understand how to manage your diabetes?" (29,30) Higher values of this measure rated on a 1–5 Likert scale reflected higher levels of self-reported understanding. To assess diabetes care self-efficacy, we used a validated four-item scale (15), with higher scores reflecting higher self-efficacy in managing diabetes. This measure has been associated with glycemic control in prospective studies (15,31). To assess self-care behaviors related to glycemic control, we used respondents' answers to a validated measure asking on how many of the past 7 days (days 0–7) they performed the following as their doctor had recommended: take diabetes medications, follow a diabetic eating plan, and monitor blood glucose (32,33). Because adherence in one area of diabetes care does not correlate strongly with adherence in others (32,34), we examined each behavior separately.

We reviewed medical records and laboratory data to document respondents' most recent HbA<sub>1c</sub> results taken within 6 months before the survey. If respondents had no documented HbA<sub>1c</sub> results in the prior 6 months, we recorded this value as missing.

We included the following patient characteristics in all the multivariate models: age, sex, annual household income ( $\leq \$10,000$ , \$10,001–30,000,  $> \$30,000$ ), education ( $<$ high school, high school, at least some college), race/ethnicity (non-Latino white, African American, Latino, Asian, Native American, or Middle Eastern), diabetes duration ( $\leq 3$  or  $\geq 4$  years), and hypoglycemic medications they were currently taking (no medications, oral medication only, or insulin  $\pm$  oral medications). To evaluate thoroughness of provider communication, we assessed the degree to which re-

spondents agreed with the following statement from the well-validated Autonomy Support Scale: "My doctor answers my questions fully and carefully" (with five response categories from "strongly disagree" to "strongly agree") (15,16). Because responses were positively skewed toward the highest rating, we dichotomized responses between those who "strongly agreed" with the statement versus all other responses. We also included variables for health care site (VA, AMC, or inner-city health system), mean number of outpatient visits in the prior year (continuous), and duration of the relationship with the doctor who takes care of the patient's diabetes (<6 months, 6 months to 1 year, 1–5 years, >5 years).

We conducted bivariate and multivariate logistic regression analyses to explore patient, provider, and health care system characteristics associated with knowing one's most recent HbA<sub>1c</sub> value. We then used multivariate linear and logistic regression to assess whether knowledge of one's last HbA<sub>1c</sub> was associated with an accurate assessment of one's level of diabetes control, diabetes care understanding, self-efficacy, and self-management behaviors related to glycemic control. To determine the sensitivity of our findings to the specific cutoff points we used in our constructed variables for knowledge of HbA<sub>1c</sub> and assessment of diabetes control, we conducted additional analyses using different cutoff points for these variables. These alternative cutoff points did not significantly change the findings. We also conducted analyses separately for patients who reported some value for their last HbA<sub>1c</sub> versus those who reported that they did not know their last HbA<sub>1c</sub> value. In these analyses, many of the statistical associations remained significant and the magnitude of effect estimates was similar. Finally, because of the differences in survey methodology and clustering of ethnic groups in different health systems, we conducted all the analyses separately for the AMC/VA sites and the inner-city health sites. Regression diagnostic procedures yielded no evidence of multicollinearity or overly influential outliers in any of the models.

**RESULTS** — Overall, the sample was socioeconomically and ethnically diverse (Table 1) with 69% non-Latino white, 17% African American, and 8% Latino

(primarily Mexican American). For education, 55% had a high school education or less; 71% had annual household incomes of \$30,000 or less. In all, 94% were receiving oral medications or insulin  $\pm$  oral medications. The mean number of outpatient visits in the past year was  $4.1 \pm 3.0$ . In total, 38% of respondents received care at the VA, 44% at the AMC, and 18% at the inner-city health systems.

Characteristics of the patients by race/ethnicity are presented in Table 1. A higher percentage of African-American and Latino respondents had incomes <\$30,000 than the other two groups and a much higher percentage of Latino respondents had not completed high school. African-American and Latino respondents predominantly received care at the inner-city health systems, with more outpatient visits in the past year and higher rates of insulin use on average. African-American and Latino respondents on average had higher recorded HbA<sub>1c</sub> values than the other two ethnic groups, with Latino respondents having the highest HbA<sub>1c</sub> values ( $8.5 \pm 2.3$ ). There were no significant differences among ethnic groups in assessments of their diabetes control, diabetes care self-efficacy, or evaluations of providers' communication. Latino respondents had lower self-reported understanding of their diabetes care and reported following a diabetes eating plan fewer days in the prior 7 days than the other groups. There were no ethnic differences in reported medication taking and blood glucose monitoring over the prior 7 days.

Overall, 66% of respondents reported that they did not know their last HbA<sub>1c</sub> value, and 25% of respondents accurately reported their most recent HbA<sub>1c</sub> value. The majority of those who reported an HbA<sub>1c</sub> value were relatively accurate (Table 2). A higher percentage of those who reported lower HbA<sub>1c</sub> values were accurate compared with patients who reported higher HbA<sub>1c</sub> levels. For example, 76% of the 67 respondents who reported that their last HbA<sub>1c</sub> was <7 had documented HbA<sub>1c</sub> values in that range, whereas 40% of the 25 respondents who reported that their last HbA<sub>1c</sub> was >10 had documented HbA<sub>1c</sub> values >10.

Table 3 shows the bivariate and adjusted odds of accurately knowing one's most recent HbA<sub>1c</sub> values. In the bivariate analyses, significantly lower percentages of Latinos (8%) accurately reported their

last HbA<sub>1c</sub> than respondents of other ethnicities. Lower percentages of respondents with less than a high school education, income  $\leq$ \$10,000, and who received care at the VA or inner-city health systems knew their HbA<sub>1c</sub> values than other groups (Table 3). Moreover, 30% of those who strongly agreed that their diabetes doctor fully answered their questions knew their HbA<sub>1c</sub>, compared with 21% of those who did not strongly agree ( $P < 0.01$ ).

In multivariate logistic regression models (Table 3), years of formal education and high evaluations of thoroughness of provider communication were associated with knowledge of recent HbA<sub>1c</sub> values. Receiving care at the VA was associated with lower odds of knowing one's recent HbA<sub>1c</sub> value. In additional analyses that included language preference (Spanish vs. English), there was no association with knowledge of HbA<sub>1c</sub>. In the separate multivariate analyses for the AMC/VA populations and inner-city populations, we found the same pattern of associations in the two groups, except that higher income remained significantly associated with HbA<sub>1c</sub> knowledge in the AMC/VA subsample.

In multivariate analyses, respondents who knew their last HbA<sub>1c</sub> value had higher odds of reporting a biomedically accurate level of diabetes control (odds ratio 1.59; 95% CI 1.05–2.42). In all, 56% of respondents who knew their HbA<sub>1c</sub> gave accurate assessments of their diabetes control compared with 45% of those who did not know their HbA<sub>1c</sub> ( $P < 0.001$ ). Similarly, knowing one's HbA<sub>1c</sub> was associated with higher scores on the measure of patients' reported diabetes care understanding ( $\beta$  0.17,  $P < 0.001$ ). Those who knew their HbA<sub>1c</sub> had mean diabetes understanding scores of  $3.80 \pm 0.89$  compared with mean scores of  $3.38 \pm 0.93$  among those who did not know their last HbA<sub>1c</sub> value ( $P < 0.001$ ). However, knowledge of HbA<sub>1c</sub> was not associated with better diabetes care self-efficacy or any of the three specific diabetes self-care domains that we assessed ( $\beta$  coefficients  $-0.032$  to  $-0.006$ ;  $P$  values 0.50–0.90). This same pattern of associations was also found when we analyzed the AMC/VA and inner-city subsamples separately.

**CONCLUSIONS** — Regular testing of HbA<sub>1c</sub> values is now the principal way

Table 1—Characteristics of study participants by race (N = 686)

|                                                              | White (%)   | Black (%)   | Latino (%)  | Other (%)   | P value |
|--------------------------------------------------------------|-------------|-------------|-------------|-------------|---------|
| n                                                            | 448         | 122         | 70          | 46          |         |
| Age (years)                                                  |             |             |             |             | 0.02    |
| 22–55                                                        | 25          | 42          | 25          | 39          |         |
| 55–70                                                        | 39          | 35          | 75          | 37          |         |
| >71                                                          | 36          | 22          | 0           | 24          |         |
| Male                                                         | 76          | 38          | 33          | 67          | <0.001  |
| Education                                                    |             |             |             |             | <0.001  |
| Less than high school                                        | 22          | 21          | 70          | 25          |         |
| High school                                                  | 31          | 29          | 12          | 15          |         |
| Some college                                                 | 47          | 49          | 18          | 60          |         |
| Annual income                                                |             |             |             |             | <0.001  |
| <\$10,000                                                    | 16          | 20          | 47          | 10          |         |
| \$10,001–30,000                                              | 51          | 64          | 44          | 36          |         |
| >\$30,000                                                    | 33          | 9           | 9           | 54          |         |
| Length of diabetes                                           |             |             |             |             | 0.05    |
| ≤3 years                                                     | 29          | 21          | 25          | 36          |         |
| ≥4 years                                                     | 71          | 79          | 75          | 64          |         |
| Hypoglycemic regimen                                         |             |             |             |             | 0.067   |
| Oral medications only                                        | 70          | 57          | 57          | 70          |         |
| Insulin ± oral medication                                    | 23          | 36          | 37          | 28          |         |
| No medication                                                | 7           | 6           | 6           | 2           |         |
| Outpatient visits in past year                               | 3.4 ± 2.3   | 5.6 ± 3.3   | 7.4 ± 4.4   | 3.3 ± 2.4   | <0.001  |
| Last HbA <sub>1c</sub> checked (%)                           | 7.3 ± 1.4   | 7.8 ± 2.2   | 8.5 ± 2.3   | 7.0 ± 1.2   | <0.001  |
| Health system                                                |             |             |             |             | <0.001  |
| VA                                                           | 52          | 23          | 7           | 64          |         |
| AMC                                                          | 48          | 13          | 7           | 26          |         |
| Inner-city                                                   | 0           | 64          | 86          | 10          |         |
| Strongly agreed that diabetes doctor answers questions fully | 30%         | 36%         | 37%         | 30%         | 0.49    |
| Had biomedically accurate assessment of diabetes control     | 48%         | 52%         | 50%         | 57%         | 0.64    |
| Self-reported understanding of diabetes self-care*           | 3.54 ± 0.91 | 3.69 ± 0.91 | 3.20 ± 0.96 | 3.64 ± 0.98 | <0.001  |
| Diabetes care self-efficacy*                                 | 70.6 ± 18.7 | 75.8 ± 17.9 | 71.5 ± 15.7 | 70.6 ± 20.6 | 0.06    |

Data are frequencies (or percent) or means ± SD for respondents with available HbA<sub>1c</sub> data. Because of rounding, percentages may not equal 100. \*Range of understanding scale was 1–5 and range of self-efficacy scale was 0–100; for both, higher scores are better.

to measure and track glycemic control in diabetes. Because of its importance as a marker of disease control, it makes sense that patient knowledge of recent and target HbA<sub>1c</sub> values might be a useful precondition for involvement in diabetes management. Accordingly, in recent years there has been an increased focus on encouraging patients to be aware of and discuss these values with their clinicians (21–23).

Few respondents in our study, however, knew their most recent HbA<sub>1c</sub> value. These low rates are similar to those of earlier studies (24–26). For example, in a 2002 study, 24% of those who reported having an HbA<sub>1c</sub> test in the past year reported an actual test value, and those self-

reported values correlated poorly with the medical record HbA<sub>1c</sub> (26). The correlates of HbA<sub>1c</sub> knowledge in our study corresponded to factors associated with key aspects of diabetes care understanding and self-care in prior studies (34–37). Although Latino respondents were less than half as likely to know their last HbA<sub>1c</sub> than patients of other ethnicities, this was largely explained by their lower educational levels. In multivariate models, more years of formal education was the only sociodemographic characteristic associated with higher odds of knowing one's recent HbA<sub>1c</sub> values. The independent association between a high evaluation of provider thoroughness of communication with HbA<sub>1c</sub> knowledge is

consistent with research on the importance of effective provider communication for improved patient understanding and chronic disease self-care (38–42). Further research should elucidate why VA respondents had significantly lower odds than patients at the other sites of knowing their last HbA<sub>1c</sub>.

In bivariate and multivariate analyses, knowing one's last HbA<sub>1c</sub> was associated both with accurately assessing one's level of diabetes control and with reporting better diabetes care understanding. Respondents who accurately reported their HbA<sub>1c</sub> values had 60% higher odds of correctly assessing their level of biomedical control of their diabetes than those who did not. These findings reinforce the

**Table 2—Comparison of respondents' reported HbA<sub>1c</sub> with their most recent documented HbA<sub>1c</sub>**

| Reported HbA <sub>1c</sub> (%) | Actual HbA <sub>1c</sub> (%) |     |     |      |     |
|--------------------------------|------------------------------|-----|-----|------|-----|
|                                | <7                           | 7–8 | 8–9 | 9–10 | >10 |
| <7                             | 51                           | 13  | 1   | 1    | 1   |
| 7–8                            | 33                           | 30  | 7   | 3    | 3   |
| 8–9                            | 11                           | 11  | 12  | 6    | 1   |
| 9–10                           | 4                            | 6   | 7   | 3    | 0   |
| >10                            | 2                            | 3   | 6   | 4    | 10  |
| Don't know                     | 186                          | 115 | 64  | 44   | 48  |

Data are n.

importance of sharing with patients clear and specific information on their disease status and markers, such as HbA<sub>1c</sub>, blood pressure, and lipid values (43). An estimated 50–80% of adults with diabetes have significant diabetes-specific knowledge and skill deficits (7,26,44). Potentially effective strategies to complement verbal communication to patients on actual and target disease values include providing clear graphical representations of these values (21,22,45) and encouraging patients to record and track laboratory and other measurements in diabetes logbooks or “passports” (46–48). Such strategies may be especially important to convey clinical information to patients with low health literacy and little formal education (49,50).

Knowledge of recent HbA<sub>1c</sub> test findings was *not* associated with either diabetes care self-efficacy or with better short-term self-management practices related to glycemic control. These findings reinforce that factors beyond knowledge of disease-specific information are necessary to heighten patients' self-confidence in their diabetes management and to improve diabetes self-management. A growing number of studies suggest that addressing patients' own perceptions of barriers to self-care and tapping into patients' values, motivations, and goals are more effective in improving metabolic control than seeking exclusively to increase knowledge about diabetes care (6,7,34,51–54). Greater patient knowledge alone does not correlate with improved glycemic control, and simply providing information more clearly is not enough to motivate patients. To enhance patients' diabetes care self-efficacy and self-management, providers need to promote patients' capacity to define the problems they are facing, make informed

decisions about their diabetes management, and set realistic goals and strategies to meet those goals (16,17,22).

Although our study's findings are consistent with prior work in this area, the study has limitations. First, we can only show associations, not causality, in this cross-sectional study. Second, these analyses only included respondents for whom we had recorded HbA<sub>1c</sub> values and who had received regular medical care in the prior year. Third, patients only were asked whether they knew their actual HbA<sub>1c</sub> values, not whether they knew what their target level should be. Knowledge of both actual and target values may be important for enabling patients to monitor their progress toward achieving diabetes control. In addition, the multiple-choice format of the HbA<sub>1c</sub> may have

cued some respondents to what their HbA<sub>1c</sub> value was. Fourth, the response rate was relatively low (55%). Those most intrinsically interested in the subject matter or with some other motivation (e.g., possibly increased need) may have been disproportionately likely to participate, reducing the generalizability of our findings. Finally, we did not have uniform eligibility criteria and selection processes for all respondents, and survey administration differed between the inner-city and other populations (in-person vs. written). Moreover, because the ethnic groups were largely clustered in different health systems, even though health site was included as a variable in all of the models, we could not adequately adjust for health site differences.

**Table 3—Bivariate and adjusted odds of accurately knowing one's most recent HbA<sub>1c</sub> value**

|                                                 | %  | Odds ratios (95% CI) |                                            |
|-------------------------------------------------|----|----------------------|--------------------------------------------|
|                                                 |    | Unadjusted           | Adjusted for other patient characteristics |
| Race                                            |    |                      |                                            |
| White                                           | 27 | Referent             | Referent                                   |
| Black                                           | 19 | 0.65 (0.37–1.11)     | 0.51 (0.22–1.18)                           |
| Latino                                          | 8  | 0.23 (0.18–0.65)     | 0.51 (0.14–1.48)                           |
| Other                                           | 37 | 1.65 (0.84–3.25)     | 1.21 (0.55–2.67)                           |
| Education                                       |    |                      |                                            |
| Less than high school                           | 7  | Referent             | Referent                                   |
| High school                                     | 22 | 3.49 (1.74–6.99)     | 2.37 (1.09–5.15)                           |
| Some college                                    | 36 | 6.91 (3.65–13.1)     | 3.72 (1.78–7.78)                           |
| Annual income                                   |    |                      |                                            |
| <\$10,000                                       | 13 | Referent             | Referent                                   |
| \$10,001–30,000                                 | 20 | 1.62 (0.90–2.90)     | 1.11 (0.55–2.23)                           |
| >\$30,000                                       | 40 | 4.39 (2.43–8.02)     | 1.81 (0.86–3.82)                           |
| Diabetes duration                               |    |                      |                                            |
| ≤3 years                                        | 25 | Referent             | Referent                                   |
| ≥4 years                                        | 26 | 1.10 (0.61–1.52)     | 1.32 (0.78–2.29)                           |
| Medications                                     |    |                      |                                            |
| Oral only                                       | 26 | Referent             | Referent                                   |
| Insulin ± oral                                  | 21 | 0.75 (0.48–1.14)     | 0.87 (0.50–1.51)                           |
| No medications                                  | 30 | 1.22 (0.60–2.49)     | 0.82 (0.34–2.01)                           |
| Health system                                   |    |                      |                                            |
| AMC                                             | 36 | Referent             | Referent                                   |
| VA                                              | 16 | 0.35 (0.23–0.53)     | 0.55 (0.33–0.92)                           |
| Inner-city                                      | 14 | 0.29 (0.16–0.52)     | 0.70 (0.26–1.89)                           |
| Whether diabetes doctor answers questions fully |    |                      |                                            |
| Did not strongly agree                          | 21 | Referent             | Referent                                   |
| Strongly agree                                  | 30 | 1.55 (1.05–2.29)     | 1.60 (1.03–2.48)                           |

The multivariable logistic models included all the variables listed in the table and also adjusted for patients' age, sex, number of outpatient visits, and having a regular doctor, none of which were associated with knowing one's most recent HbA<sub>1c</sub>. Accurately knowing one's last HbA<sub>1c</sub> was defined as accurately reporting (within a ±0.5 range) one's last HbA<sub>1c</sub> value.



- tors of weight loss and weight-loss maintenance. *J Pers Soc Psychol* 70:115–126, 1996
32. Toobert DJ, Hampson SE, Glasgow RE: The summary of diabetes self-care activities measure: results from 7 studies and a revised scale. *Diabetes Care* 23:943–950, 2000
  33. Toobert DJ, Glasgow RE: Assessing diabetes self-management: the summary of diabetes self-care activities questionnaire. In *Handbook of Psychology and Diabetes*. Clare Bradley, Ed. Amsterdam, Harwood Academic Publishers, 1994, p. 351–378
  34. Goodall TA, Halford WK: Self-management of diabetes mellitus: a critical review. *Health Psychol* 10:1–8, 1991
  35. Goldman DP, Smith JP: Can patient self-management help explain the SES health gradient? *Proc Natl Acad Sci USA* 99:10929–10934, 2002
  36. Glasgow RE, Hampson SE, Strycker LA, Ruggiero L: Personal-model beliefs and social-environmental barriers related to diabetes self-management. *Diabetes Care* 20:556–561, 1997
  37. Sherbourne CD, Hays RD, Ordway L, DiMatteo MR, Kravitz RL: Antecedents of adherence to medical recommendations: results from the Medical Outcomes Study. *J Behav Med* 15:447–468, 1992
  38. DiMatteo MR: The physician-patient relationship: effects on the quality of health care. *Clin Obstet Gynecol* 37:149–161, 1994
  39. Heisler M, Bouknight RR, Hayward RA, Smith DM, Kerr EA: The relative importance of physician communication, participatory decision making, and patient understanding in diabetes self-management. *J Gen Intern Med* 17:243–252, 2002
  40. Michie S, Miles J, Weinman J: Patient-centeredness in chronic illness: what is it and does it matter? *Patient Educ Couns* 51:197–206, 2003
  41. Kravitz RL, Hays RD, Sherbourne CD, DiMatteo MR, Rogers WH, Ordway L, Greenfield S: Recall of recommendations and adherence to advice among patients with chronic medical conditions. *Arch Intern Med* 153:1869–1878, 1993
  42. Stewart MA: Effective physician-patient communication and health outcomes: a review. *CMAJ* 152:1423–1433, 1995
  43. Funnell MM, Anderson RM: Patient empowerment: a look back, a look ahead. *Diabetes Educ* 29:454–458, 2003
  44. Clement S: Diabetes self-management education. *Diabetes Care* 18:1204–1214, 1995
  45. Chapin RB, Williams DC, Adair RF: Diabetes control improved when inner-city patients received graphic feedback about glycosylated hemoglobin levels. *J Gen Intern Med* 18:120–124, 2003
  46. Lafata JE, Baker AM, Divine GW, McCarthy BD, Xi H: The use of computerized birthday greeting reminders in the management of diabetes. *J Gen Intern Med* 17:521–530, 2002
  47. Mainous AG 3rd, King DE, Hueston WJ, Gill JM, Pearson WS: The utility of a portable patient record for improving ongoing diabetes management. *Diabetes Educ* 28:196–198, 2002
  48. Simmons D, Gamble GD, Foote S, Cole DR, Coster G: The New Zealand Diabetes Passport Study: a randomized controlled trial of the impact of a diabetes passport on risk factors for diabetes-related complications. *Diabet Med* 21:214–217, 2004
  49. Schillinger D, Grumbach K, Piette J, Wang F, Osmond D, Daher C, Palacios J, Sullivan GD, Bindman AB: Association of health literacy with diabetes outcomes. *JAMA* 288:475–482, 2002
  50. Baker DW, Gazmararian JA, Williams MV, Scott T, Parker RM, Green D, Ren J, Peel J: Functional health literacy and the risk of hospital admission among Medicare managed care enrollees. *Am J Public Health* 92:1278–1283, 2002
  51. Brown SA: Interventions to promote diabetes self-management: state of the science. *Diabetes Educ* 25:52–61, 1999
  52. Bodenheimer T, Lorig K, Holman H, Grumbach K: Patient self-management of chronic disease in primary care. *JAMA* 288:2469–2475, 2002
  53. Holman H, Lorig K: Patients as partners in managing chronic disease: partnership is a prerequisite for effective and efficient health care. *Br Med J* 320: 526–527, 2000
  54. Wolpert HA, Anderson BJ: Management of diabetes: are doctors framing the benefits from the wrong perspective? *Br Med J* 323:994–996, 2001
